# Supplementary material for: Self-supported bimetallic Ni–Co compound electrodes for urea- and neutralization energy-assisted electrolytic hydrogen production
Source: Royal Society of Chemistry journal article supplement (doi:10.1039/c8nr06740f), 2018-01-01
Supplement: c8nr06740f1.pdf [file c8nr06740f1.pdf]

**Supporting Information:**

**Self-supported Bimetallic Ni-Co Compounds Electrodes for  
Urea and Neutralization Energy Assisted Electrolysis  
Hydrogen Production**

Genxiang Wang<sup>a,b</sup>, Zhenhai Wen<sup>a\*</sup>

<sup>a</sup>CAS Key Laboratory of Design and Assembly of Functional Nanostructures, and  
Fujian Provincial Key Laboratory of Nanomaterials, Fujian Institute of Research on  
the Structure of Matter, Chinese Academy of Sciences, Fuzhou, Fujian 350002, China

<sup>b</sup>University of Chinese Academy of Sciences, Beijing 100049, P. R. China

## **Contents**

- 1. Electrochemical neutralization energy**
- 2. Calculation of turnover Frequency (TOF)**
- 3. Production quantification analysis**
- 4. Figures S1-S10**
- 5. Tables S1-S4**
- 6. References**

## 1. The electrochemical neutralization energy-the Effects of pH gradient ( $\Delta\text{pH}$ ) between anode and cathode

As showed in the pourbaix diagram of water (Figure S10), the theoretical applied voltage for water splitting is always 1.23 V as long as the same electrolyte in both anode and cathode chamber. However, bipolar membrane allows the sustainable use of distinct electrolyte compositions with different pH in two separate chambers, and the applied voltage can be tuned by differing pH between the anode chamber and cathode chamber. When HER in 0.5 M  $\text{H}_2\text{SO}_4$  (pH = 0) as the cathode and OER in 1.0 M KOH (pH = 14) as the anode are assembled in the two chambers forming a pH-gradient concentration cell for water electrolysis, the reactions and its corresponding Nernst equations can be expressed as following:

### For water electrolysis in the base-acid electrolyzer:

#### HER at the cathode:

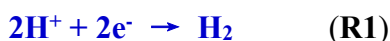

$$E_{\text{HER}} = E_{\text{H}^+/\text{H}_2}^\theta - 2.303 \frac{RT}{2F} \log \left[ \frac{\alpha_{\text{H}_2}}{(\alpha_{\text{H}^+})^2} \right] = 0 \text{ V} - 0.059 * \text{pH}_{\text{cathode}} = 0$$

$$(E_{\text{H}^+/\text{H}_2}^\theta = 0 \text{ V vs. RHE}) \quad (\text{Eq.1})$$

#### OER at the anode:

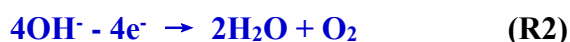

$$E_{\text{OER}} = E_{\text{O}_2/\text{OH}^-}^\theta - 2.303 \frac{RT}{4F} \log \left[ \frac{(\alpha_{\text{OH}^-})^4}{(\alpha_{\text{H}_2\text{O}})^2(\alpha_{\text{O}_2})} \right] = 1.23 \text{ V} - 0.059 * \text{pH}_{\text{anode}} = 0.404$$

$$(E_{\text{O}_2/\text{OH}^-}^\theta = 1.23 \text{ V vs. RHE}) \quad (\text{Eq.2})$$

### The overall reaction for water splitting:

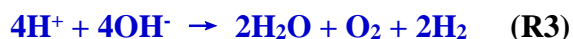

$$\begin{aligned}
V_{\text{theoretical required}} &= E_{O_2/OH^-}^\theta - E_{H^+/H_2}^\theta - 2.303 \frac{RT}{4F} \log \left[ \frac{(\alpha_{H_2O})^2 (\alpha_{O_2}) (\alpha_{H_2})^2}{(\alpha_{H^+})^4 (\alpha_{OH^-})^4} \right] \\
&= 1.23 - 0.059 * (pH_{\text{anode}} - pH_{\text{cathode}}) = \mathbf{0.404}
\end{aligned}$$

**(Eq.3)**

In these equations, F is the Faraday constant, 96 485 C mol<sup>-1</sup>, T is the room temperature (commonly 298.15 K), R is the gas constant (8.314 J mol<sup>-1</sup> K<sup>-1</sup>),  $pH_{\text{anode}} - pH_{\text{cathode}}$  is the pH difference ( $\Delta pH$ ) of the two chambers, and the  $2.303 \frac{RT}{F} * \Delta pH$  is equal to the electrochemical neutralization energy deriving from the reaction of hydroxide ion and proton combining to water, which provides an additional energy or voltage for water splitting as presented in **Equation 4**,

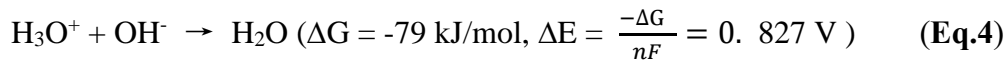

Therefore, assisted by the electrochemical neutralization energy, the theoretical applied voltage is only 0.404 V for electrochemical water electrolysis in an alkaline-acid electrolyzer with  $\Delta pH = 14$ , which greatly lowered the energy input for hydrogen production. Therefore, when the anode OER was replaced by urea oxidation reaction (UOR), the applied voltage can be further decreased, and the reactions and its corresponding Nernst equations can be expressed as following:

**For water electrolysis in the base-acid electrolyzer with UOR replacing OER:**

**HER at the cathode:**

**The same as R1**

**UOR at the anode:**

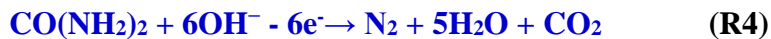

$$E_{UOR} = E_{UOR}^\theta - 2.303 \frac{RT}{6F} \log \left[ \frac{(\alpha_{CO(NH_2)_2}) (\alpha_{OH^-})^6}{(\alpha_{N_2}) (\alpha_{H_2O})^5 (\alpha_{CO_2})} \right] = 0.37 \text{ V} - 0.059 * pH = -0.456$$

$$(E_{UOR}^{\theta} = 0.37 \text{ V vs. RHE}) \quad (\text{Eq.5})$$

**The overall reaction:**

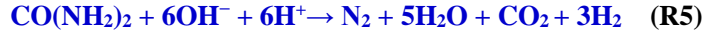

**V** Theory required or open circuit

$$\begin{aligned} &= E_{UOR}^{\theta} - E_{\frac{\text{H}^+}{\text{H}_2}}^{\theta} \\ &- 2.303 \frac{RT}{6F} \log \left[ \frac{(\alpha_{\text{H}_2\text{O}})^5 (\alpha_{\text{N}_2}) (\alpha_{\text{H}_2})^3 (\alpha_{\text{CO}_2})}{(\alpha_{\text{CO(NH}_2)_2}) (\alpha_{\text{H}^+})^6 (\alpha_{\text{OH}^-})^6} \right] \\ &= 0.37 - 0.059 * (\text{pH}_{\text{anode}} - \text{pH}_{\text{cathode}}) = \mathbf{-0.456} \quad (\text{Eq.6}) \end{aligned}$$

According to the **Equation 6**, once the UOR replace the OER, the theoretical applied voltage is -0.456 V, suggesting that the as-proposed alkaline-acid electrolyzer can theoretically supply power with simultaneous hydrogen production. However, the electrolyzer still need applied voltage to drive the electrolysis H<sub>2</sub> production, owing to the overpotentials from the two half reactions, HER and UOR. Even so, coupling UOR with pH-gradient concentration cell, energy input for hydrogen production could largely be reduced compared with traditional water splitting.

## 2. Calculation of turnover Frequency (TOF)

The TOF was calculated by assuming every metal atom taking part in the UOR:

$$\text{TOF} = \frac{jS}{6nF}$$

Where  $j$  (mA cm<sup>-2</sup>) is the measured current density at  $\eta_{\text{UOR}} = 1.1$  V,  $S$  (1 cm<sup>2</sup>) is the geometric surface area of the carbon cloth, 6 means the number of electrons transferred per mole of urea,  $F$  is the faradaic constant (96485 C mol<sup>-1</sup>), and  $n$  is the moles of the metal atom involved in the electrode which is calculated from the weight of the catalysts supported on the carbon cloth.

### 3. Production quantification analysis

The produced H<sub>2</sub> in the cathode was collected by drainage method and H<sub>2</sub> was analyzed by the gas chromatograph equipped with a thermal conductivity detector (TCD). The Faradaic Efficiency calculation formula is expressed as below (Eq.7),  $\alpha$  denotes the numbers of transferred electrons (*e.g.*  $\alpha = 2$  for H<sub>2</sub>),  $n$  denotes the number of moles of the obtained products,  $F$  is the faradaic constant, 96 485 C mol<sup>-1</sup>, and  $Q$  denotes the whole passed charge. H<sub>2</sub> and N<sub>2</sub> was collected by the chronopotentiometry experiment conducted at 20 mA cm<sup>-2</sup> in the homemade cell with gas collection setup (Figure S9) separated by a bipolar membrane with Ni<sub>0.67</sub>Co<sub>0.33</sub>(OH)<sub>2</sub>/CC as the anode for UOR in 1.0 M KOH and Ni<sub>0.67</sub>Co<sub>0.33</sub>S<sub>2</sub>/CC as the cathode for HER in 0.5 M H<sub>2</sub>SO<sub>4</sub>. The time were recorded every produced 0.5 mL H<sub>2</sub> in the cathode at room temperature (25 °C) and the specific data was presented in Table S4.

$$EF = \frac{\alpha n F}{Q} \quad (\text{Eq.7})$$

In these work, the whole passed charge  $Q$  could be obtained from the applied current and the maintained time, namely,  $Q = I * t$ , while  $n$  could be obtained by the volume of obtained H<sub>2</sub> ( $V$ ), *i.e.*,  $n = V/24.5$ , (24.5 L mol<sup>-1</sup> is the gas constant at 25 °C), and the volume can be qualitatively determined by the GC analysis. The actual equation can be expressed as following:

$$EF = \frac{\alpha V F}{I t * 24.5} \quad (\text{Eq. 8})$$

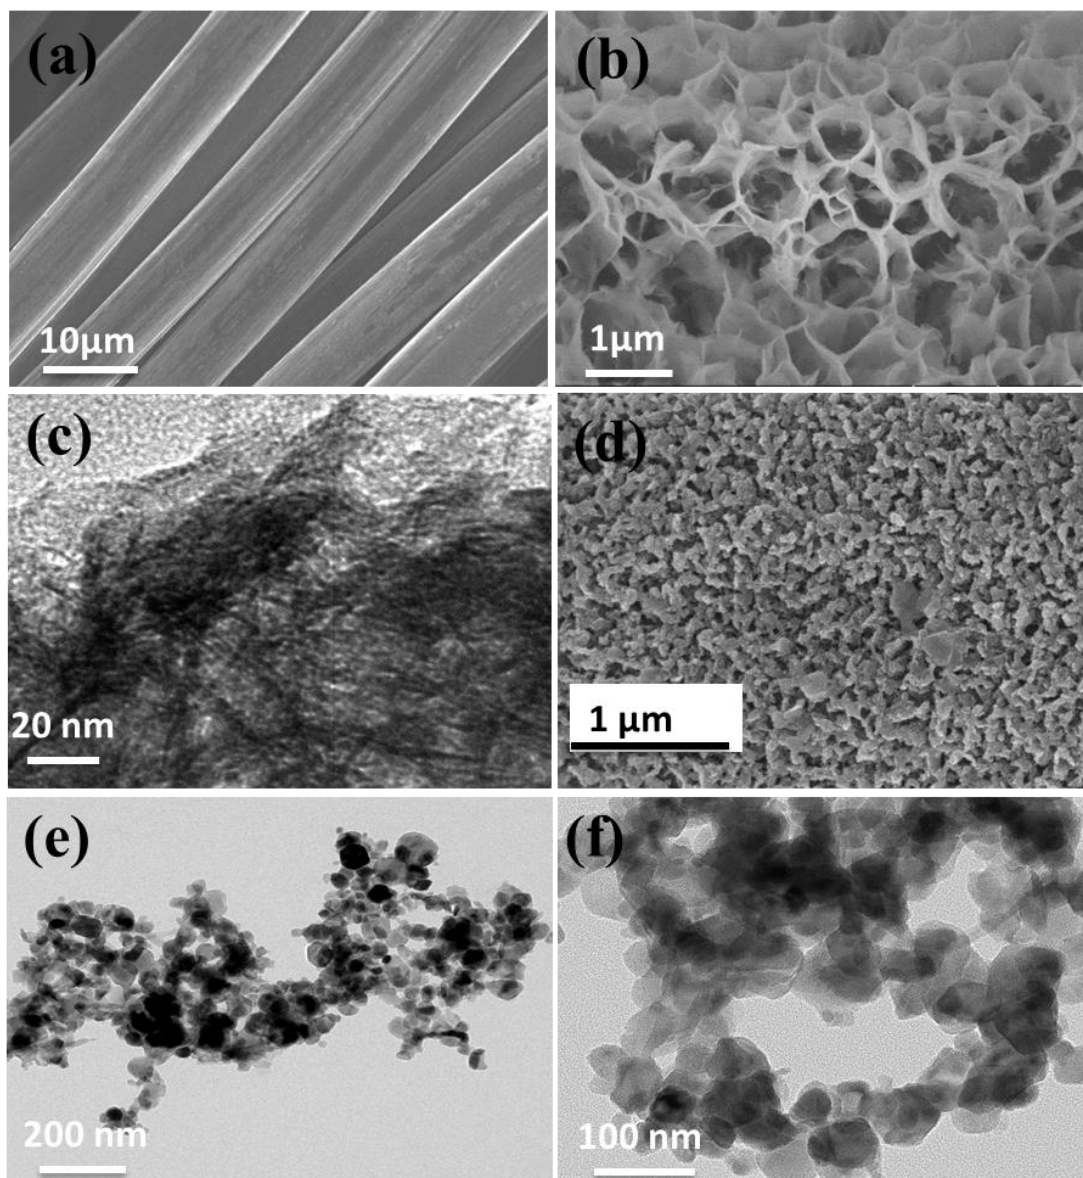

**Figure S1.** SEM images of carbon cloth (a), Ni<sub>0.67</sub>Co<sub>0.33</sub>(OH)<sub>2</sub>/CC (b), Ni<sub>0.67</sub>Co<sub>0.33</sub>S<sub>2</sub>/CC (d), and TEM images for Ni<sub>0.67</sub>Co<sub>0.33</sub>(OH)<sub>2</sub>/CC (c) and Ni<sub>0.67</sub>Co<sub>0.33</sub>S<sub>2</sub>/CC (e-f).

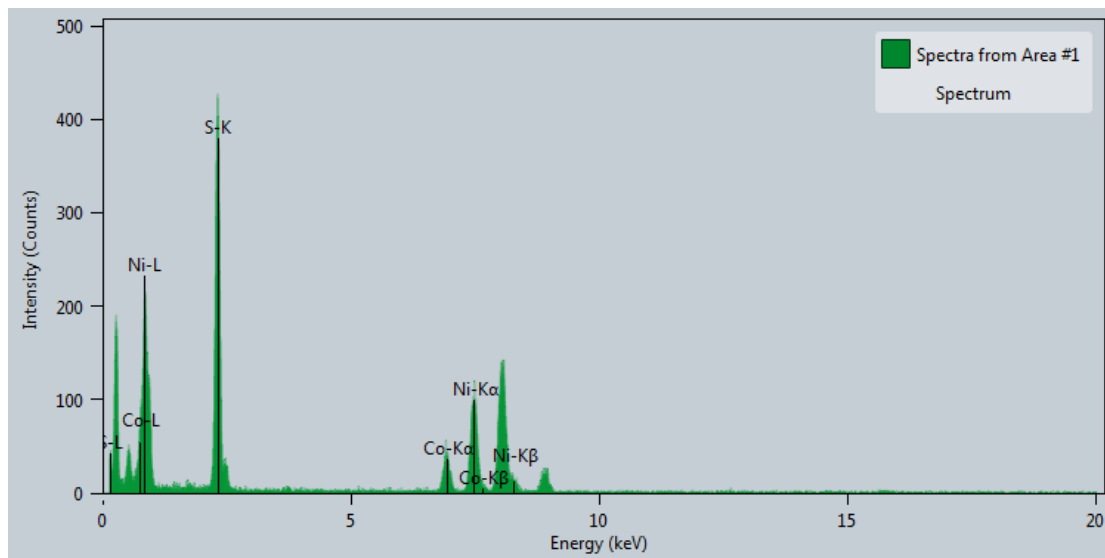

**Figure S2.** the EDX elemental distribution spectrum of  $\text{Ni}_{0.67}\text{Co}_{0.33}\text{S}_2$



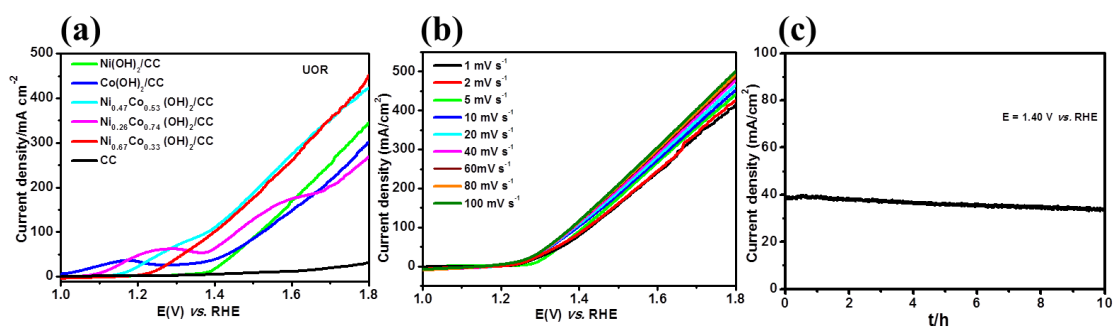

**Figure S3.** (a) UOR polarization curves of Ni(OH)<sub>2</sub>/CC, Co(OH)<sub>2</sub>/CC, Ni<sub>0.47</sub>Co<sub>0.53</sub>(OH)<sub>2</sub>/CC, Ni<sub>0.26</sub>Co<sub>0.74</sub>(OH)<sub>2</sub>/CC, Ni<sub>0.67</sub>Co<sub>0.33</sub>(OH)<sub>2</sub>/CC, and CC; (b) LSV curves of Ni<sub>0.67</sub>Co<sub>0.33</sub>(OH)<sub>2</sub>/CC electrode in 1 M KOH with 0.5 M urea at different scan rate; (c) it curves of Ni<sub>0.67</sub>Co<sub>0.33</sub>(OH)<sub>2</sub>/CC electrode in 1 M KOH with 0.5 M urea concentration at 1.40 V vs. RHE;

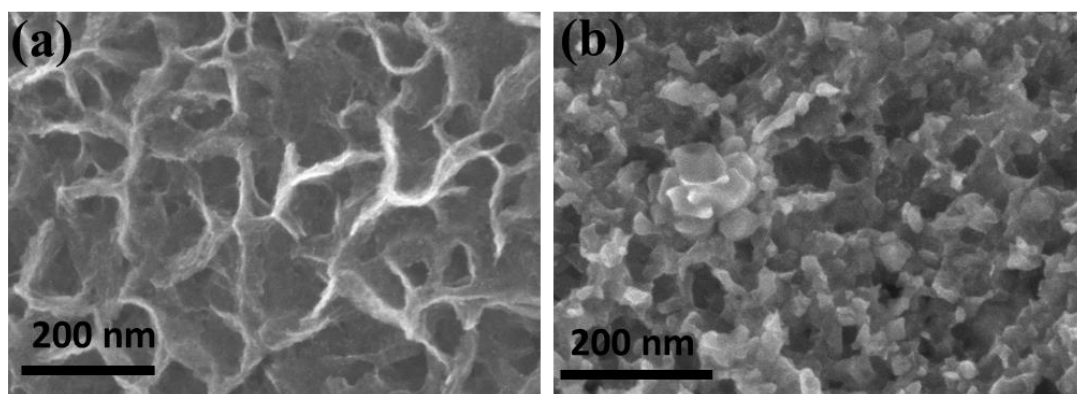

**Figure S4.** SEM image of  $\text{Ni}_{0.67}\text{Co}_{0.33}(\text{OH})_2$  after 10-hours durability measurement at 1.40 V in 1.0 M KOH containing 0.5 M urea (a) and nearly 15 h continuous operation in 0.5 M  $\text{H}_2\text{SO}_4$  at a current density of  $10 \text{ mA cm}^{-2}$ .

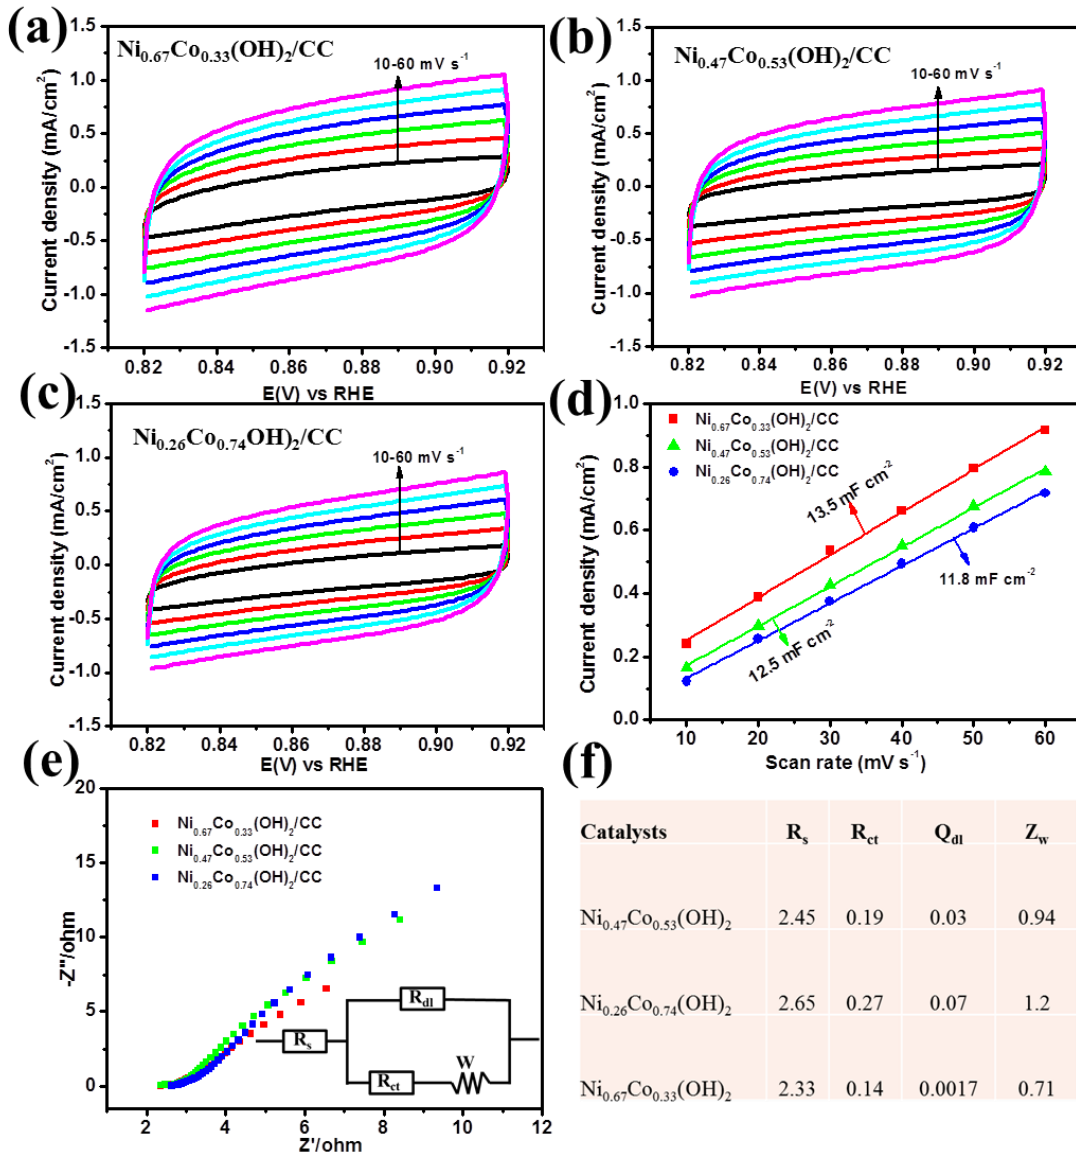

**Figure S5.** Electrochemical cyclic voltammetry curves of  $Ni_{0.67}Co_{0.33}(OH)_2/CC$  (a),  $Ni_{0.47}Co_{0.53}(OH)_2/CC$  (b), and  $Ni_{0.26}Co_{0.74}(OH)_2/CC$  (c) with scan rates ranging from  $10\text{ mV s}^{-1}$  to  $60$  with a step of  $10\text{ mV s}^{-1}$ , the potential is scanned from  $0.82$  to  $0.92\text{ V vs. RHE}$  where no faradic current was detected (d) The extracted double-layer capacitances ( $C_{dl}$ ) of different Ni/Co ratio electrodes using a cyclic voltammetry method (e) EIS Nyquist plots recorded on different Ni/Co ratio electrodes at  $1.36\text{ V vs. RHE}$ . Inset shows the proposed equivalent circuit. (f) the corresponding fitted parameters.  $R_s$  and  $R_{ct}$ :  $\Omega$ ,  $Q_{dl}$ :  $\Omega^{-1}\cdot S^n$ .  $Z_w$ :  $\Omega^{-1}\cdot S^{1/2}$ .

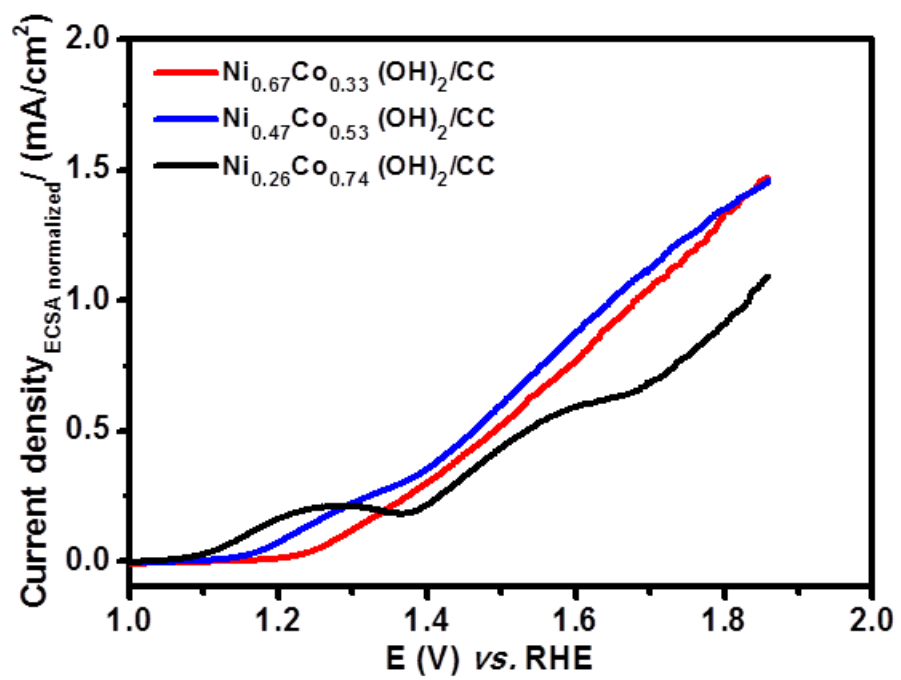

Figure S6. The normalized polarization curves of Ni<sub>1-x</sub>Co<sub>x</sub>(OH)<sub>2</sub>/CC by ECSA .

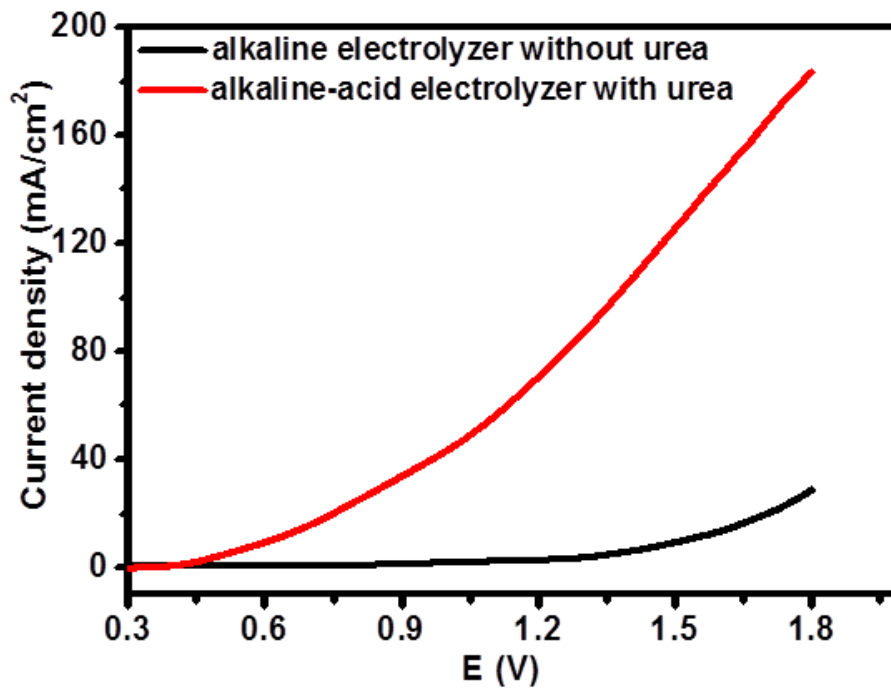

**Figure S7.** LSV curves for the alkaline (1.0 M KOH)-acid (0.5 M H<sub>2</sub>SO<sub>4</sub>) electrolyzer with urea oxidation in anode and traditional water electrolysis in 1.0 M KOH

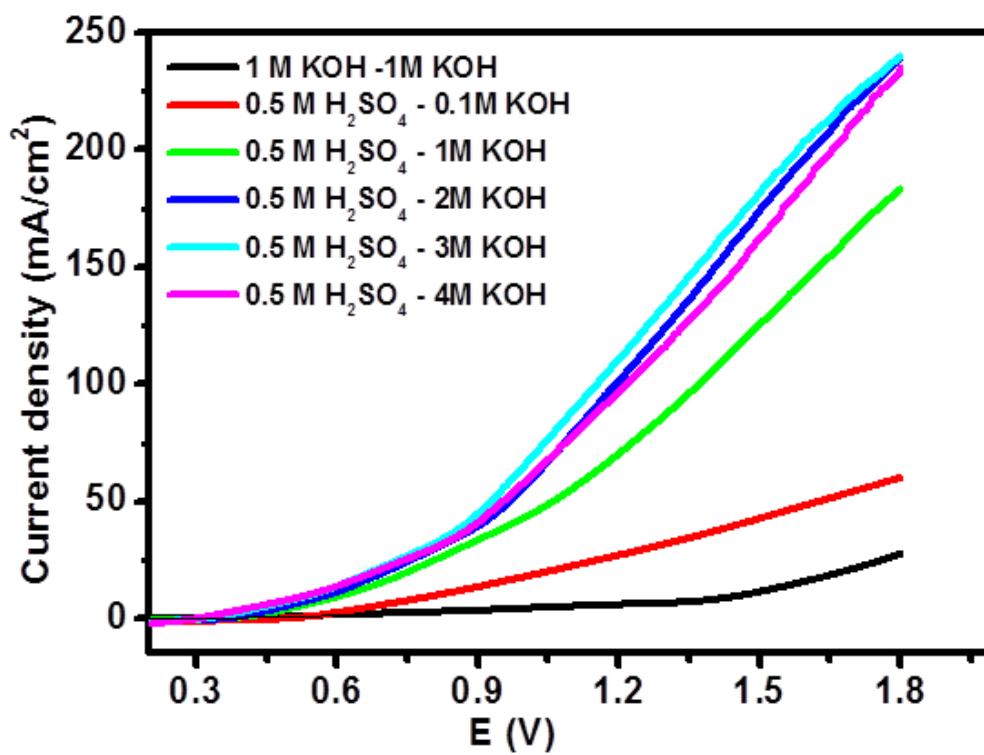

**Figure S8.** LSV curves for the electrolyzer (HER&UOR) under different pH difference of the anode and cathode chambers

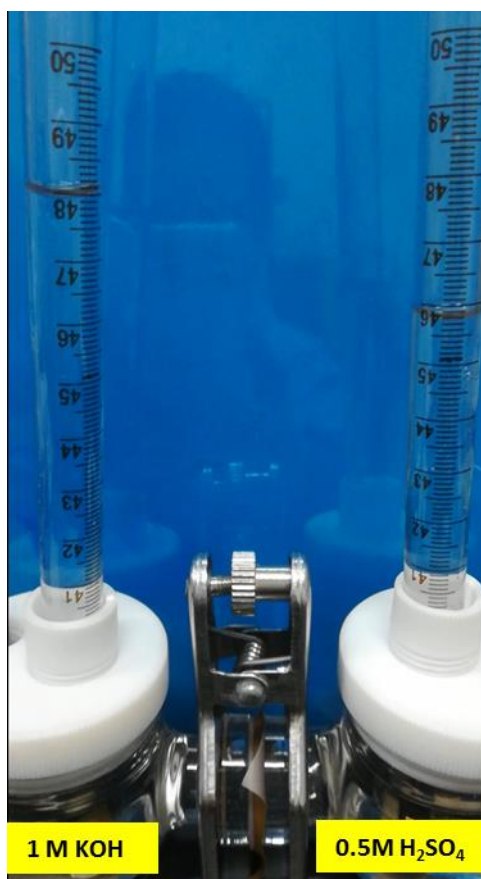

**Figure S9.** Home-made electrolyzer (HER&UOR) for evaluating Faradaic Efficiency of H<sub>2</sub>

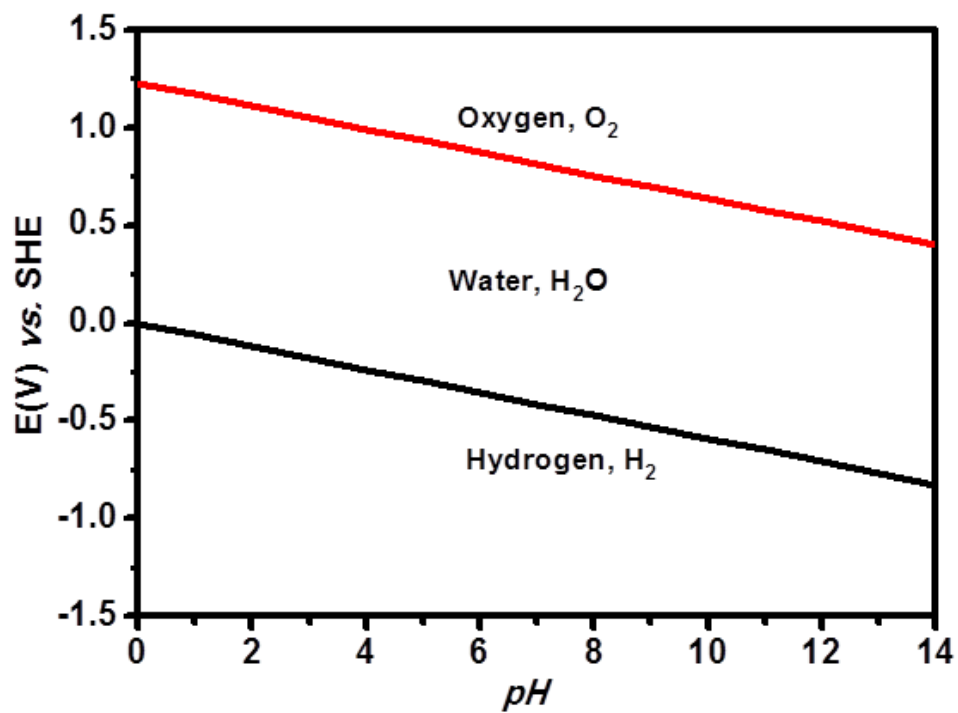

**Figure S10.** A pourbaix diagram of water with curves obtained by the Nernst equation (Equations 1 and 2)



**Table S1.** List of catalysts' performance for urea oxidation in recent reports

| Catalysts                                                   | Urea concentration | Electrolytes | Applied voltage at 10 mA cm <sup>-2</sup> /(V) | Refs      |
|-------------------------------------------------------------|--------------------|--------------|------------------------------------------------|-----------|
| Ni-MOF                                                      | 0.33 M             | 1.0 M KOH    | 1.36                                           | 1         |
| Ni <sub>2</sub> P/CC                                        | 0.5 M              | 1.0 M KOH    | 1.38                                           | 2         |
| Ni <sub>3</sub> N/CC                                        | 0.5 M              | 1.0 M KOH    | 1.35                                           | 3         |
| Carbon/Ni-Fe/NF                                             | 0.33 M             | 1.0 M KOH    | 1.39                                           | 4         |
| Metallic Ni(OH) <sub>2</sub>                                | 0.33 M             | 1.0 M KOH    | 1.39                                           | 5         |
| MnO <sub>2</sub> /MnCo <sub>2</sub> O <sub>4</sub>          | 0.5 M              | 1.0 M KOH    | 1.33                                           | 6         |
| S-MnO <sub>2</sub>                                          | 0.5 M              | 1.0 M KOH    | 1.33                                           | 7         |
| NF/NiMoO-Ar                                                 | 0.5 M              | 1.0 M KOH    | 1.37                                           | 8         |
| Ni <sub>0.67</sub> Co <sub>0.33</sub> (OH) <sub>2</sub> /CC | 0.5 M              | 1.0 M KOH    | 1.23                                           | This work |

**Table S2.** Elemental compositions of the products obtained by ICP<sup>a</sup>

| Ni/Co feed ratio | Ni/Co ratio in           | Composition of Ni <sub>1-x</sub> Co <sub>x</sub> (OH) <sub>2</sub> |
|------------------|--------------------------|--------------------------------------------------------------------|
| 1/1              | 0.887                    | Ni <sub>0.47</sub> Co <sub>0.53</sub> (OH) <sub>2</sub>            |
| 1/2              | 0.351                    | Ni <sub>0.26</sub> Co <sub>0.74</sub> (OH) <sub>2</sub>            |
| 2/1              | 2.030                    | Ni <sub>0.67</sub> Co <sub>0.33</sub> (OH) <sub>2</sub>            |
| 2/1              | 2.08 (after sulfidizing) | Ni <sub>0.67</sub> Co <sub>0.33</sub> S <sub>2</sub>               |

<sup>a</sup> The error in the ICP measurement was 5%

**Table S3.** Comparison of the reported double-cell with biomass oxidation and single-cell with urea oxidation in recent two years

| Catalysts                                                                | Anodic oxidation | Electrolytes                                       | Applied voltage at 10 mA cm <sup>-2</sup> /(V) | Refs      |
|--------------------------------------------------------------------------|------------------|----------------------------------------------------|------------------------------------------------|-----------|
| Ni <sub>3</sub> S <sub>2</sub> /NF <sup>d</sup>                          | 10 mM HMF        | 1.0 M KOH                                          | 1.46                                           | 9         |
| Ni <sub>2</sub> P NPA/NF <sup>d</sup>                                    | 10 mM HMF        | 1.0 M KOH                                          | 1.44                                           | 10        |
| Co-P/CF <sup>d</sup>                                                     | 10 mM HMF        | 1.0 M KOH                                          | 1.39 <sup>m</sup>                              | 11        |
| hp-Ni <sup>d</sup>                                                       | Benzyl alcohol   | 1.0 M KOH                                          | 1.50                                           | 12        |
| Ni <sub>2</sub> P/Ni/NF <sup>d</sup>                                     | 30 mM furfural   | 1.0 M KOH                                          | 1.48                                           | 13        |
| 3D PdCu alloy NSs <sup>d</sup>                                           | 1.0 M Ethanol    | 1.0 M KOH                                          | NG                                             | 14        |
| Ultrathin Co <sub>3</sub> O <sub>4</sub> NSs <sup>d</sup>                | 1.0 M Ethanol    | 1.0 M KOH                                          | NG                                             | 15        |
| Zn <sub>0.08</sub> Co <sub>0.92</sub> P <sup>s</sup>                     | 0.5 M urea       | 1.0 M KOH                                          | 1.38                                           | 16        |
| Ni <sub>2</sub> P NF/CC <sup>s</sup>                                     | 0.5 M urea       | 1.0 M KOH                                          | 1.0 <sup>m</sup>                               | 2         |
| MnO <sub>2</sub> /MnCo <sub>2</sub> O <sub>4</sub> /Ni <sup>s</sup>      | 0.5 M urea       | 1.0 M KOH                                          | 1.58                                           | 6         |
| Small-sized MnO <sub>2</sub> <sup>s</sup>                                | 0.5 M urea       | 1.0 M KOH                                          | 1.41                                           | 7         |
| CoS <sub>2</sub> NA/Ti <sup>s</sup>                                      | 0.3 M urea       | 1.0 M KOH                                          | 1.59                                           | 17        |
| Ni-Mo-O nanorod                                                          | 0.3 M urea       | 1.0 M KOH                                          | 1.38                                           | 8         |
| Ni <sub>3</sub> N nanosheet/CC                                           | 0.33 M urea      | 1.0 M KOH                                          | 1.44                                           | 3         |
| CuCl/rGO                                                                 | 0.5 M urea       | 2.0 M KOH and 0.5 M H <sub>2</sub> SO <sub>4</sub> | 0.83 V                                         | 18        |
| Ni <sub>0.67</sub> Co <sub>0.33</sub> (OH) <sub>2</sub> /CC <sup>d</sup> | 0.5 M urea       | 1.0 M KOH and 0.5 M H <sub>2</sub> SO <sub>4</sub> | 0.61                                           | this work |
|                                                                          | 0.5 M urea       | 3.0 M KOH and 0.5 M H <sub>2</sub> SO <sub>4</sub> | 0.54                                           | this work |

HMF: 5-hydroxymethylfurfural,

CC: Carbon cloth

d: double-cell

s: single-cell

m: evaluated in its figures

NG: not given

**Table S4.** The recorded data for Faradaic Efficiency of H<sub>2</sub> at current density of 20 mA cm<sup>-2</sup>

| t/s  | V/mL | n/mol      | Evolution rate of H <sub>2</sub> (μmol h <sup>-1</sup> ) | EF      |
|------|------|------------|----------------------------------------------------------|---------|
| 415  | 0.5  | 4.08163E-5 | 354.06934                                                | 0.94896 |
| 618  | 1    | 6.12245E-5 | 356.64751                                                | 0.95586 |
| 830  | 1.5  | 8.16327E-5 | 354.06934                                                | 0.94896 |
| 1050 | 2    | 1.02041E-4 | 349.85423                                                | 0.93766 |
| 1218 | 2.5  | 1.22449E-4 | 361.91817                                                | 0.96999 |
| 1416 | 3    | 1.42857E-4 | 363.19613                                                | 0.97342 |
| 1608 | 3.5  | 1.63265E-4 | 365.51934                                                | 0.97964 |
| 1810 | 4    | 1.83673E-4 | 365.3174                                                 | 0.9791  |
| 2000 | 4.5  | 2.04082E-4 | 367.34694                                                | 0.98454 |
| 2190 | 5    | 2.2449E-4  | 369.02432                                                | 0.98904 |
| 2376 | 5.5  | 2.44898E-4 | 371.05751                                                | 0.99449 |
| 2569 | 6    | 2.65306E-4 | 371.7797                                                 | 0.99642 |
| 2782 | 6.5  | 2.85714E-4 | 369.72373                                                | 0.99091 |
| 2973 | 7    | 3.06122E-4 | 370.68309                                                | 0.99348 |
| 3156 | 7.5  | 3.26531E-4 | 372.46838                                                | 0.99827 |
| 3360 | 8    | 3.46939E-4 | 371.72012                                                | 0.99626 |
| 3657 | 8.5  | 3.67347E-4 | 361.62127                                                | 0.9692  |
| 3826 | 9    | 3.87755E-4 | 364.85059                                                | 0.97785 |

## Reference:

1. D. Zhu, C. Guo, J. Liu, L. Wang, Y. Du and S.-Z. Qiao, *Chem. Commun.*, 2017, **53**, 10906-10909.
2. D. Liu, T. Liu, L. Zhang, F. Qu, G. Du, A. M. Asiri and X. Sun, *J. Mater. Chem. A*, 2017, **5**, 3208-3213.
3. Q. Liu, L. Xie, F. Qu, Z. Liu, G. Du, A. M. Asiri and X. Sun, *Inorg. Chem. Front.*, 2017, **4**, 1120-1124.
4. M.-S. Wu, C. Y. Jao, F.-Y. Chuang and F.-Y. Chen, *Electrochim Acta*, 2017, **227**, 210-216.
5. X. Zhu, X. Dou, J. Dai, X. An, Y. Guo, L. Zhang, S. Tao, J. Zhao, W. Chu and X. C. Zeng, *Angew. Chem. Int. Ed.*, 2016, **55**, 12465-12469.
6. C. Xiao, S. Li, X. Zhang and D. R. MacFarlane, *J. Mater. Chem. A*, 2017, **5**, 7825-7832.
7. S. Chen, J. Duan, A. Vasileff and S. Z. Qiao, *Angew. Chem. Int. Ed.*, 2016, **128**, 3868-3872.
8. Z.-Y. Yu, C.-C. Lang, M.-R. Gao, Y. Chen, Q.-Q. Fu, Y. Duan and S.-H. Yu, *Energ. Environ. Sci.*, 2018, **11**, 1890-1897.
9. B. You, X. Liu, N. Jiang and Y. Sun, *J. Am. Chem. Soc.*, 2016, **138**, 13639-13646.
10. B. You, N. Jiang, X. Liu and Y. Sun, *Angew. Chem. Int. Ed.*, 2016, **128**, 10067-10071.
11. N. Jiang, B. You, R. Boonstra, I. M. Terrero Rodriguez and Y. Sun, *ACS Energy Lett.*, 2016, **1**, 386-390.
12. B. You, X. Liu, X. Liu and Y. Sun, *ACS Catal.*, 2017, **7**, 4564-4570.
13. N. Jiang, X. Liu, J. Dong, B. You, X. Liu and Y. Sun, *ChemNanoMat*, 2017, **3**, 491-495.
14. X. Zhao, L. Dai, Q. Qin, F. Pei, C. Hu and N. Zheng, *Small*, 2017, **13**, 1602970.
15. L. Dai, Q. Qin, X. Zhao, C. Xu, C. Hu, S. Mo, Y. O. Wang, S. Lin, Z. Tang and N. Zheng, *ACS Cent. Sci.*, 2016, **2**, 538-544.
16. T. T. Liu, D. N. Liu, F. L. Qu, D. X. Wang, L. Zhang, R. X. Ge, S. Hao, Y. J. Ma, G. Du, A. M. Asiri, L. Chen and X. P. Sun, *Adv. Energy Mater.*, 2017, **7**, 1700020..
17. S. Wei, X. Wang, J. Wang, X. Sun, L. Cui, W. Yang, Y. Zheng and J. Liu, *Electrochim Acta*, 2017.
18. G. Wang, J. Chen, Y. Li, J. Jia, P. Cai and Z. Wen, *Chem. Commun.*, 2018, **54**, 2603-2606.
